# Supplementary material
Source: PubMed Central journal article supplement (PMC3204665)
Supplement: NIHMS307430-supplement-SuppReferences.pdf [file NIHMS307430-supplement-SuppReferences.pdf]

**Supplemental reading list****Genes and pathways in IBD**

- 1 Lander, E. S. Initial impact of the sequencing of the human genome. *Nature* **470**, 187-197, doi:nature09792 [pii]  
10.1038/nature09792 (2011).
- 2 Zhu, Q. *et al.* A Genome-wide Comparison of the Functional Properties of Rare and Common Genetic Variants in Humans. *Am J Hum Genet*, doi:S0002-9297(11)00100-5 [pii]  
10.1016/j.ajhg.2011.03.008 (2011).
- 3 Zenewicz, L. A., Abraham, C., Flavell, R. A. & Cho, J. H. Unraveling the genetics of autoimmunity. *Cell* **140**, 791-797, doi:S0092-8674(10)00239-4 [pii]  
10.1016/j.cell.2010.03.003 (2010).
- 4 Melum, E. *et al.* Genome-wide association analysis in primary sclerosing cholangitis identifies two non-HLA susceptibility loci. *Nat Genet* **43**, 17-19, doi:ng.728 [pii]  
10.1038/ng.728 (2011).
- 5 Goyette, P. *et al.* Gene-centric association mapping of chromosome 3p implicates MST1 in IBD pathogenesis. *Mucosal immunology* **1**, 131-138, doi:10.1038/mi.2007.15 (2008).
- 6 Melmed, G. Y. & Targan, S. R. Future biologic targets for IBD: potentials and pitfalls. *Nat Rev Gastroenterol Hepatol* **7**, 110-117, doi:nrgastro.2009.218 [pii]  
10.1038/nrgastro.2009.218 (2010).
- 7 Dorhoi, A. *et al.* The adaptor molecule CARD9 is essential for tuberculosis control. *J Exp Med* **207**, 777-792, doi:10.1084/jem.20090067 (2010).
- 8 Werninghaus, K. *et al.* Adjuvanticity of a synthetic cord factor analogue for subunit Mycobacterium tuberculosis vaccination requires FcRgamma-Syk-Card9-dependent innate immune activation. *J Exp Med* **206**, 89-97, doi:10.1084/jem.20081445 (2009).

- 9 Singh, S. B., Davis, A. S., Taylor, G. A. & Deretic, V. Human IRGM induces autophagy to eliminate intracellular mycobacteria. *Science* **313**, 1438-1441, doi:10.1126/science.1129577 (2006).

### Epithelial encounters and pathogenicity

- 10 Hooper, L. V. & Macpherson, A. J. Immune adaptations that maintain homeostasis with the intestinal microbiota. *Nat Rev Immunol* **10**, 159-169, doi:10.1038/nri2710 (2010).
- 11 Salim, S. a. Y. & Söderholm, J. D. Importance of disrupted intestinal barrier in inflammatory bowel diseases. *Inflammatory bowel diseases* **17**, 362-381, doi:10.1002/ibd.21403 (2011).
- 12 Swidsinski, A., Loening-Baucke, V. & Herber, A. Mucosal flora in Crohn's disease and ulcerative colitis - an overview. *J Physiol Pharmacol* **60 Suppl 6**, 61-71 (2009).
- 13 Van der Sluis, M. *et al.* Muc2-deficient mice spontaneously develop colitis, indicating that MUC2 is critical for colonic protection. *Gastroenterology* **131**, 117-129, doi:10.1053/j.gastro.2006.04.020 (2006).
- 14 Bertolotti, A. *et al.* Increased sensitivity to dextran sodium sulfate colitis in IRE1beta-deficient mice. *J Clin Invest* **107**, 585-593, doi:10.1172/JCI11476 (2001).
- 15 Zhao, F. *et al.* Disruption of Paneth and goblet cell homeostasis and increased endoplasmic reticulum stress in Agr2<sup>-/-</sup> mice. *Dev Biol* **338**, 270-279, doi:10.1016/j.ydbio.2009.12.008 (2010).
- 16 Martinon, F., Chen, X., Lee, A. H. & Glimcher, L. H. TLR activation of the transcription factor XBP1 regulates innate immune responses in macrophages. *Nat Immunol* **11**, 411-418, doi:ni.1857 [pii] 10.1038/ni.1857 (2010).
- 17 Shkoda, A. *et al.* Interleukin-10 blocked endoplasmic reticulum stress in intestinal epithelial cells: impact on chronic inflammation. *Gastroenterology* **132**, 190-207, doi:S0016-5085(06)02264-5 [pii]

10.1053/j.gastro.2006.10.030 (2007).

- 18 Vereecke, L. *et al.* Enterocyte-specific A20 deficiency sensitizes to tumor necrosis factor-induced toxicity and experimental colitis. *J Exp Med* **207**, 1513-1523, doi:jem.20092474 [pii]

10.1084/jem.20092474 (2010).

- 19 Goldberg, R. F. *et al.* Intestinal alkaline phosphatase is a gut mucosal defense factor maintained by enteral nutrition. *Proc Natl Acad Sci U S A* **105**, 3551-3556, doi:0712140105 [pii]

10.1073/pnas.0712140105 (2008).

- 20 Rimoldi, M. *et al.* Intestinal immune homeostasis is regulated by the crosstalk between epithelial cells and dendritic cells. *Nat Immunol* **6**, 507-514, doi:10.1038/ni1192 (2005).

- 21 Taylor, B. C. *et al.* TSLP regulates intestinal immunity and inflammation in mouse models of helminth infection and colitis. *J Exp Med* **206**, 655-667, doi:10.1084/jem.20081499 (2009).

- 22 Iliev, I. D., Mileti, E., Matteoli, G., Chieppa, M. & Rescigno, M. Intestinal epithelial cells promote colitis-protective regulatory T-cell differentiation through dendritic cell conditioning. *Mucosal immunology* **2**, 340-350, doi:10.1038/mi.2009.13 (2009).

### Checkpoints in the innate immune response

- 23 Dunay, I. R. *et al.* Gr1(+) inflammatory monocytes are required for mucosal resistance to the pathogen *Toxoplasma gondii*. *Immunity* **29**, 306-317, doi:S1074-7613(08)00326-9 [pii]

10.1016/j.immuni.2008.05.019 (2008).

- 24 Smythies, L. E. *et al.* Human intestinal macrophages display profound inflammatory anergy despite avid phagocytic and bacteriocidal activity. *J Clin Invest* **115**, 66-75, doi:10.1172/JCI19229 (2005).

- 25 Lodes, M. J. *et al.* Bacterial flagellin is a dominant antigen in Crohn disease. *J Clin Invest* **113**, 1296-1306, doi:10.1172/JCI20295 (2004).

- 26 Oh, D. Y. *et al.* GPR120 is an omega-3 fatty acid receptor mediating potent anti-inflammatory and insulin-sensitizing effects. *Cell* **142**, 687-698, doi:10.1016/j.cell.2010.07.041 (2010).
- 27 Rakoff-Nahoum, S., Paglino, J., Eslami-Varzaneh, F., Edberg, S. & Medzhitov, R. Recognition of commensal microflora by toll-like receptors is required for intestinal homeostasis. *Cell* **118**, 229-241, doi:10.1016/j.cell.2004.07.002 (2004).
- 28 Chen, G., Shaw, M. H., Kim, Y. G. & Nunez, G. NOD-like receptors: role in innate immunity and inflammatory disease. *Annu Rev Pathol* **4**, 365-398, doi:10.1146/annurev.pathol.4.110807.092239 (2009).
- 29 Wang, Y. *et al.* Rig-I<sup>-/-</sup> mice develop colitis associated with downregulation of G alpha i2. *Cell Res* **17**, 858-868, doi:cr200781 [pii] 10.1038/cr.2007.81 (2007).
- 30 Kullberg, B. J. *et al.* Crohn's disease patients homozygous for the 3020insC NOD2 mutation have a defective NOD2/TLR4 cross-tolerance to intestinal stimuli. *Immunology* **123**, 600-605, doi:10.1111/j.1365-2567.2007.02735.x (2008).
- 31 Hedl, M. & Abraham, C. Secretory mediators regulate nod2-induced tolerance in human macrophages. *Gastroenterology* **140**, 231-241, doi:10.1053/j.gastro.2010.09.009 (2011).
- 32 Watanabe, T. *et al.* Muramyl dipeptide activation of nucleotide-binding oligomerization domain 2 protects mice from experimental colitis. *J Clin Invest* **118**, 545-559, doi:10.1172/JCI33145 (2008).
- 33 Shaw, M. H. *et al.* T cell-intrinsic role of Nod2 in promoting type 1 immunity to *Toxoplasma gondii*. *Nat Immunol* **10**, 1267-1274, doi:10.1038/ni.1816 (2009).
- 34 Wang, T.-T. *et al.* Direct and indirect induction by 1,25-dihydroxyvitamin D3 of the NOD2/CARD15-defensin beta2 innate immune pathway defective in Crohn disease. *J Biol Chem* **285**, 2227-2231, doi:10.1074/jbc.C109.071225 (2010).

- 35 Esworthy, R. S. *et al.* Mice with combined disruption of Gpx1 and Gpx2 genes have colitis. *Am J Physiol Gastrointest Liver Physiol* **281**, G848-855 (2001).

### Effectors and regulators of adaptive immunity

- 36 Ochs, H. D., Oukka, M. & Torgerson, T. R. TH17 cells and regulatory T cells in primary immunodeficiency diseases. *J Allergy Clin Immunol* **123**, 977-983; quiz 984-975, doi:10.1016/j.jaci.2009.03.030 (2009).
- 37 Boniface, K. *et al.* Human Th17 cells comprise heterogeneous subsets including IFN-gamma-producing cells with distinct properties from the Th1 lineage. *J Immunol* **185**, 679-687, doi:10.4049/jimmunol.1000366 (2010).
- 38 Littman, D. R. & Rudensky, A. Y. Th17 and regulatory T cells in mediating and restraining inflammation. *Cell* **140**, 845-858, doi:10.1016/j.cell.2010.02.021 (2010).
- 39 Yen, D. *et al.* IL-23 is essential for T cell-mediated colitis and promotes inflammation via IL-17 and IL-6. *J Clin Invest* **116**, 1310-1316, doi:10.1172/JCI21404 (2006).
- 40 Hovhannisyan, Z., Treatman, J., Littman, D. R. & Mayer, L. Characterization of interleukin-17-producing regulatory T cells in inflamed intestinal mucosa from patients with inflammatory bowel diseases. *Gastroenterology* **140**, 957-965, doi:S0016-5085(10)01774-9 [pii] 10.1053/j.gastro.2010.12.002 (2011).
- 41 Gutcher, I. *et al.* Autocrine Transforming Growth Factor-beta1 Promotes In Vivo Th17 Cell Differentiation. *Immunity* **34**, 396-408, doi:S1074-7613(11)00083-5 [pii] 10.1016/j.immuni.2011.03.005 (2011).
- 42 Sutton, C. E. *et al.* Interleukin-1 and IL-23 induce innate IL-17 production from gammadelta T cells, amplifying Th17 responses and autoimmunity. *Immunity* **31**, 331-341, doi:S1074-7613(09)00327-6 [pii] 10.1016/j.immuni.2009.08.001 (2009).

- 43 Martin, B., Hirota, K., Cua, D. J., Stockinger, B. & Veldhoen, M. Interleukin-17-producing gammadelta T cells selectively expand in response to pathogen products and environmental signals. *Immunity* **31**, 321-330, doi:10.1016/j.immuni.2009.06.020 (2009).
- 44 Benita, Y. *et al.* Gene enrichment profiles reveal T-cell development, differentiation, and lineage-specific transcription factors including ZBTB25 as a novel NF-AT repressor. *Blood* **115**, 5376-5384, doi:blood-2010-01-263855 [pii] 10.1182/blood-2010-01-263855 (2010).
- 45 Lu, L. F. & Rudensky, A. Molecular orchestration of differentiation and function of regulatory T cells. *Genes Dev* **23**, 1270-1282, doi:23/11/1270 [pii] 10.1101/gad.1791009 (2009).
- 46 El Kasmi, K. C. *et al.* Cutting edge: A transcriptional repressor and corepressor induced by the STAT3-regulated anti-inflammatory signaling pathway. *J Immunol* **179**, 7215-7219 (2007).
- 47 Saraiva, M. & O'Garra, A. The regulation of IL-10 production by immune cells. *Nat Rev Immunol* **10**, 170-181, doi:10.1038/nri2711 (2010).
- 48 Chinen, T., Volchkov, P. Y., Chervonsky, A. V. & Rudensky, A. Y. A critical role for regulatory T cell-mediated control of inflammation in the absence of commensal microbiota. *J Exp Med* **207**, 2323-2330, doi:10.1084/jem.20101235 (2010).
- 49 Murai, M. *et al.* Interleukin 10 acts on regulatory T cells to maintain expression of the transcription factor Foxp3 and suppressive function in mice with colitis. *Nat Immunol* **10**, 1178-1184, doi:ni.1791 [pii] 10.1038/ni.1791 (2009).
- 50 Anthony, R. M., Wermeling, F., Karlsson, M. C. I. & Ravetch, J. V. Identification of a receptor required for the anti-inflammatory activity of IVIG. *Proceedings of the National Academy of Sciences of the United States of America* **105**, 19571-19578, doi:10.1073/pnas.0810163105 (2008).
- 51 Mizoguchi, A., Mizoguchi, E., Takedatsu, H., Blumberg, R. S. & Bhan, A. K. Chronic intestinal inflammatory condition generates IL-10-producing

- regulatory B cell subset characterized by CD1d upregulation. *Immunity* **16**, 219-230 (2002).
- 52 Carter, N. A. *et al.* Mice Lacking Endogenous IL-10-Producing Regulatory B Cells Develop Exacerbated Disease and Present with an Increased Frequency of Th1/Th17 but a Decrease in Regulatory T Cells. *J Immunol*, doi:jimmunol.1100284 [pii] 10.4049/jimmunol.1100284 (2011).

### Mucosal ecology and immune responses in disease

- 53 Sonnenburg, E. D. *et al.* Specificity of polysaccharide use in intestinal bacteroides species determines diet-induced microbiota alterations. *Cell* **141**, 1241-1252, doi:10.1016/j.cell.2010.05.005 (2010).
- 54 Byres, E. *et al.* Incorporation of a non-human glycan mediates human susceptibility to a bacterial toxin. *Nature* **456**, 648-652, doi:nature07428 [pii] 10.1038/nature07428 (2008).
- 55 Wang, J. *et al.* Kynurenic acid as a ligand for orphan G protein-coupled receptor GPR35. *J Biol Chem* **281**, 22021-22028, doi:10.1074/jbc.M603503200 (2006).
- 56 Maslowski, K. M. & Mackay, C. R. Diet, gut microbiota and immune responses. *Nature Publishing Group* **12**, 5-9, doi:10.1038/ni0111-5 (2011).
- 57 Romani, L. *et al.* Defective tryptophan catabolism underlies inflammation in mouse chronic granulomatous disease. *Nature* **451**, 211-215, doi:nature06471 [pii] 10.1038/nature06471 (2008).
- 58 Duan, J., Chung, H., Troy, E. & Kasper, D. L. Microbial colonization drives expansion of IL-1 receptor 1-expressing and IL-17-producing gamma/delta T cells. *Cell Host Microbe* **7**, 140-150, doi:10.1016/j.chom.2010.01.005 (2010).

- 59 Hall, J. A. *et al.* Commensal DNA limits regulatory T cell conversion and is a natural adjuvant of intestinal immune responses. *Immunity* **29**, 637-649, doi:10.1016/j.immuni.2008.08.009 (2008).
- 60 Round, J. L. & Mazmanian, S. K. Inducible Foxp3+ regulatory T-cell development by a commensal bacterium of the intestinal microbiota. *Proceedings of the National Academy of Sciences of the United States of America* **107**, 12204-12209, doi:10.1073/pnas.0909122107 (2010).
- 61 Lapaquette, P., Glasser, A.-L., Huett, A., Xavier, R. J. & Darfeuille-Michaud, A. Crohn's disease-associated adherent-invasive E. coli are selectively favoured by impaired autophagy to replicate intracellularly. *Cell Microbiol* **12**, 99-113, doi:10.1111/j.1462-5822.2009.01381.x (2010).
- 62 Strauss, J. *et al.* Invasive potential of gut mucosa-derived fusobacterium nucleatum positively correlates with IBD status of the host. *Inflamm Bowel Dis*, doi:10.1002/ibd.21606 (2011).
- 63 Png, C. W. *et al.* Mucolytic bacteria with increased prevalence in IBD mucosa augment in vitro utilization of mucin by other bacteria. *Am J Gastroenterol* **105**, 2420-2428, doi:10.1038/ajg.2010.281 (2010).
